# Supplementary material
Source: PubMed Central journal article supplement (PMC4974890)
Supplement: CJN.12051115SupplementaryData.pdf [file CJN.12051115SupplementaryData.pdf]

**Supplementary Table 1.** Key Demographic and Renal Characteristics of All ACCORD Participants and Participants with Banked Blood/Urine Specimens

|                             | <b>All ACCORD Participants<br/>(n=10251)</b> | <b>Baseline and follow-up plasma<br/>and urine samples (n=3262)</b> | <b>P</b> |
|-----------------------------|----------------------------------------------|---------------------------------------------------------------------|----------|
| Age, Mean (SD)              | 62.8 (6.6)                                   | 62.3 (6.3)                                                          | 0.72     |
| Male, n (%)                 | 6299 (61.5)                                  | 1829 (55)                                                           | 0.81     |
| Race, n (%)                 |                                              |                                                                     | 0.56     |
| White                       | 6393 (62.4)                                  | 2134 (64.2)                                                         |          |
| Black                       | 1953 (19.1)                                  | 500 (15.1)                                                          |          |
| Hispanic                    | 737 (7.1)                                    | 259 (7.8)                                                           |          |
| Other                       | 1168 (11.4)                                  | 430 (12.9)                                                          |          |
| Baseline eGFR, Median [IQR] | 89.6 [75.4-105.1]                            | 90.1 (76.1-105.2)                                                   | 0.91     |
| Baseline UACR, Median [IQR] | 14 [7-47]                                    | 13 [7-41]                                                           | 0.78     |

**Supplementary Table 2. Odds Ratios (OR) and 95% Confidence Intervals (CI) for sustained 40% decline in eGFR for urinary biomarkers modeled categorically and continuously**

|                                                 | <b>Model 1<br/>Odds Ratio<br/>(95% CI)</b> | <b>Model 2<br/>Odds Ratio<br/>(95% CI)</b> | <b>Model 3<br/>Odds Ratio<br/>(95% CI)</b> |
|-------------------------------------------------|--------------------------------------------|--------------------------------------------|--------------------------------------------|
| <b>Participants without albuminuria (n=214)</b> |                                            |                                            |                                            |
| <=89 pg/ml                                      | 1 (Ref)                                    | 1 (Ref)                                    | 1 (Ref)                                    |
| 90-177 pg/ml                                    | 1.71 (0.86-3.51)                           | 1.81 (0.85-3.83)                           | 2.40 (0.97-5.97)                           |
| 178-324 pg/ml                                   | 2.84 (1.47-5.81)                           | 3.01 (1.81-6.02)                           | 2.69 (1.00-8.18)                           |
| >=325 pg/mg                                     | 4.14 (2.00-9.40)                           | 5.02 (1.68-10.07)                          | 6.58 (1.91-17.22)                          |
| OR per 1 unit increase in log MCP1/mg           | 2.00 (1.28-3.12)                           | 1.99 (1.22-3.22)                           | 2.33 (1.29-4.23)                           |
| <b>Participants with albuminuria (n=166)</b>    |                                            |                                            |                                            |
| <=0.14 pg/mg                                    | 1 (Ref)                                    | 1 (Ref)                                    | 1 (Ref)                                    |
| 0.15-0.25 pg/mg                                 | 1.41 (0.45-4.42)                           | 1.44 (0.40-5.22)                           | 1.90 (0.63-5.71)                           |
| 0.26-0.44 pg/mg                                 | 1.58 (0.64-3.84)                           | 1.69 (0.63-4.50)                           | 3.80 (1.01-14.83)                          |
| >=0.45 pg/mg                                    | 2.86 (1.10-6.87)                           | 3.87 (1.65-10.31)                          | 5.13 (1.78-13.30)                          |
| OR per 1 unit increase in log IL18/mg           | 1.74 (1.02-2.95)                           | 1.89 (1.04-3.44)                           | 2.05 (1.21-4.99)                           |

**Supplementary Table 3. Odds Ratios (OR) and 95% Confidence Intervals (CI) for sustained 40% decline in eGFR for urinary biomarkers not indexed to urinary creatinine modeled categorically and continuously**

|                                       | <b>Model 1<br/>Odds Ratio<br/>(95% CI)</b> | <b>Model 2<br/>Odds Ratio<br/>(95% CI)</b> | <b>Model 3<br/>Odds Ratio<br/>(95% CI)</b> |
|---------------------------------------|--------------------------------------------|--------------------------------------------|--------------------------------------------|
| <b><u>Urinary MCP-1</u></b>           |                                            |                                            |                                            |
| <=0.88 pg/mg                          | 1 (Ref)                                    | 1 (Ref)                                    | 1 (Ref)                                    |
| 0.89-1.35 pg/mg                       | 1.32 (0.57-3.04)                           | 1.33 (0.56-3.19)                           | 1.91 (0.60-6.08)                           |
| 1.36—2.11 pg/mg                       | 1.96 (0.89-4.35)                           | 1.92 (0.84-4.38)                           | 2.97 (0.97-9.13)                           |
| >2.11 pg/mg                           | 3.83 (1.70-8.63)                           | 3.88 (1.66-9.05)                           | 9.92 (2.81-34.97)                          |
| OR per 1 unit increase in log MCP1/mg | 1.32 (1.04-1.67)                           | 1.34 (1.04-1.72)                           | 1.61 (1.12-2.32)                           |
| <b><u>Urinary IL-18</u></b>           |                                            |                                            |                                            |
| <=13 pg/ml                            | 1 (Ref)                                    | 1 (Ref)                                    | 1 (Ref)                                    |
| 14-29 pg/ml                           | 1.45 (0.69-3.01)                           | 1.45 (0.67-3.15)                           | 1.64 (0.58-4.60)                           |
| 30-58 pg/ml                           | 0.94 (0.47-1.90)                           | 0.99 (0.47-2.12)                           | 0.98 (0.35-2.76)                           |
| >=59 pg/ml                            | 1.53 (0.75-3.15)                           | 1.35 (0.62-2.94)                           | 1.30 (0.50-3.44)                           |
| OR per 1 unit increase in log IL18    | 1.11 (0.89-1.40)                           | 1.10 (0.86-1.42)                           | 1.10 (0.86-1.42)                           |
| <b><u>Urinary KIM-1</u></b>           |                                            |                                            |                                            |
| <=428 pg/ml                           | 1 (Ref)                                    | 1 (Ref)                                    | 1 (Ref)                                    |
| 429-904 pg/ml                         | 1.48 (0.68-3.23)                           | 1.57 (0.67-1.66)                           | 1.58 (0.68-3.68)                           |
| 905-1510 pg/ml                        | 1.08 (0.48-2.42)                           | 0.90 (0.38-2.15)                           | 0.90 (0.38-2.13)                           |
| >=1511 pg/ml                          | 2.26 (0.99-5.11)                           | 2.55 (1.04-6.26)                           | 2.51 (1.02-6.19)                           |
| OR per 1 unit increase in log KIM1    | 1.10 (0.86-1.40)                           | 1.13 (0.87-1.48)                           | 1.12 (0.85-1.46)                           |
| <b><u>Urinary YKL40/Cr</u></b>        |                                            |                                            |                                            |
| <=63 pg/ml                            | 1 (Ref)                                    | 1 (Ref)                                    | 1 (Ref)                                    |
| 64-301 pg/ml                          | 1.23 (0.61-2.51)                           | 1.25 (0.59-2.66)                           | 1.79 (0.66-4.87)                           |
| 302-694 pg/ml                         | 1.34 (0.66-2.70)                           | 1.57 (0.72-3.41)                           | 2.16 (0.77-6.09)                           |
| >=695 pg/ml                           | 1.18 (0.57-2.42)                           | 1.18 (0.54-2.58)                           | 1.59 (0.52-4.89)                           |
| OR per 1 unit increase in log YKL40   | 1.01 (0.87-1.16)                           | 1.00 (0.86-1.17)                           | 1.05 (0.84-1.31)                           |

**Model 1:** Conditional Logistic Model with cases and controls; **Model 2:** Model 1 + diabetic/cardiovascular risk factors (HbA1c; Mean Arterial Pressure; History of Cardiovascular Disease; intensive glycemic and blood pressure control); **Model 3:** Model 2 + Medications (Fibrates/ ACE-Inhibitors/Angiotensin Receptor Blockers/ Thiazolidinedione)

**Supplementary Table 4. Odds Ratios (OR) and 95% Confidence Intervals (CI) for CKD Stage 3b or higher for urinary biomarkers indexed to urinary creatinine modeled categorically and continuously**

|                                     | <b>Model 1<br/>Odds Ratio<br/>(95% CI)</b> | <b>Model 2<br/>Odds Ratio<br/>(95% CI)</b> | <b>Model 3<br/>Odds Ratio<br/>(95% CI)</b> |
|-------------------------------------|--------------------------------------------|--------------------------------------------|--------------------------------------------|
| <b><u>Urinary MCP-1</u></b>         |                                            |                                            |                                            |
| <=260 pg/ml                         | 1 (Ref)                                    | 1 (Ref)                                    | 1 (Ref)                                    |
| 90-177 pg/ml                        | 1.80 (1.00-3.25)                           | 1.95 (1.04-3.68)                           | 1.69 (0.77-3.59)                           |
| 178-324 pg/ml                       | 2.39 (1.29-4.43)                           | 2.56 (1.31-5.02)                           | 3.01 (1.29-7.04)                           |
| >=325 pg/mg                         | 2.99 (1.60-5.59)                           | 3.51 (1.75-7.030)                          | 5.48 (2.24-13.39)                          |
| OR per 1 unit increase in log MCP1  | 1.37 (1.11-1.68)                           | 1.40 (1.12-1.76)                           | 1.50 (1.14-1.97)                           |
| <b><u>Urinary IL-18</u></b>         |                                            |                                            |                                            |
| <=13 pg/ml                          | 1 (Ref)                                    | 1 (Ref)                                    | 1 (Ref)                                    |
| 14-29 pg/ml                         | 1.43 (0.80-2.54)                           | 1.38 (0.75-2.54)                           | 1.76 (0.85-3.64)                           |
| 30-58 pg/ml                         | 1.44 (0.83-2.49)                           | 1.32 (0.73-2.38)                           | 1.75 (0.86-3.57)                           |
| >=59 pg/ml                          | 1.60 (0.92-2.78)                           | 1.54 (0.85-2.79)                           | 1.87 (0.92-3.79)                           |
| OR per 1 unit increase in log IL18  | 1.12 (0.94-1.35)                           | 1.10 (0.91-1.35)                           | 1.13 (0.90-1.43)                           |
| <b><u>Urinary KIM-1</u></b>         |                                            |                                            |                                            |
| <=428 pg/ml                         | 1 (Ref)                                    | 1 (Ref)                                    | 1 (Ref)                                    |
| 429-904 pg/ml                       | 0.82 (0.46-1.46)                           | 0.94 (0.51-1.75)                           | 1.20 (0.57-2.49)                           |
| 905-1510 pg/ml                      | 1.51 (0.85-2.68)                           | 1.64 (0.90-3.00)                           | 2.06 (0.97-4.27)                           |
| >=1511 pg/ml                        | 1.45 (0.80-2.63)                           | 1.50 (0.79-2.84)                           | 1.92 (0.90-4.07)                           |
| OR per 1 unit increase in log KIM1  | 1.06 (0.87-1.30)                           | 1.09 (0.88-1.36)                           | 1.21 (0.94-1.57)                           |
| <b><u>Urinary YKL40/Cr</u></b>      |                                            |                                            |                                            |
| <=63 pg/ml                          | 1 (Ref)                                    | 1 (Ref)                                    | 1 (Ref)                                    |
| 64-301 pg/ml                        | 1.31 (0.72-2.39)                           | 1.38 (0.73-2.60)                           | 1.51 (0.74-3.10)                           |
| 302-694 pg/ml                       | 1.56 (0.86-2.82)                           | 1.67 (0.88-3.18)                           | 1.90 (0.92-3.97)                           |
| >=695 pg/ml                         | 1.08 (0.63-1.87)                           | 1.14 (0.63-2.05)                           | 1.33 (0.66-2.71)                           |
| OR per 1 unit increase in log YKL40 | 1.06 (0.87-1.30)                           | 1.04 (0.93-1.15)                           | 1.08 (0.94-1.25)                           |

**Model 1:** Conditional Logistic Model with cases and controls; **Model 2:** Model 1 + diabetic/cardiovascular risk factors (HbA1c; Mean Arterial Pressure; History of Cardiovascular Disease; intensive glycemic and blood pressure control); **Model 3:** Model 2 + Medications (Fibrates/ ACE-Inhibitors/Angiotensin Receptor Blockers/ Thiazolidinedione)

**Supplementary Table 5. Odds Ratios (OR) and 95% Confidence Intervals (CI) for sustained 40% decline in eGFR for change in urinary biomarkers from baseline to 24 months**

|                                               | <b>Model 1<br/>Odds Ratio<br/>(95% CI)</b> | <b>Model 2<br/>Odds Ratio<br/>(95% CI)</b> | <b>Model 3<br/>Odds Ratio<br/>(95% CI)</b> |
|-----------------------------------------------|--------------------------------------------|--------------------------------------------|--------------------------------------------|
| <b><u>Urinary MCP-1</u></b>                   |                                            |                                            |                                            |
| OR per unit change from baseline to 24 months | 1.00 (0.99-1.01)                           | 1.00 (0.99-1.01)                           | 1.00 (0.99-1.02)                           |
| <b><u>Urinary IL-18</u></b>                   |                                            |                                            |                                            |
| OR per unit change from baseline to 24 months | 1.12 (0.94-1.35)                           | 1.10 (0.91-1.35)                           | 1.13 (0.90-1.43)                           |
| <b><u>Urinary KIM-1</u></b>                   |                                            |                                            |                                            |
| OR per unit change from baseline to 24 months | 1.06 (0.87-1.30)                           | 1.09 (0.88-1.36)                           | 1.21 (0.94-1.57)                           |
| <b><u>Urinary YKL40/Cr</u></b>                |                                            |                                            |                                            |
| OR per unit change from baseline to 24 months | 1.06 (0.87-1.30)                           | 1.04 (0.93-1.15)                           | 1.08 (0.94-1.25)                           |

**Model 1:** Conditional Logistic Model with cases and controls; **Model 2:** Model 1 + diabetic/cardiovascular risk factors (HbA1c; Mean Arterial Pressure; History of Cardiovascular Disease; intensive glycemic and blood pressure control); **Model 3:** Model 2 + Medications (Fibrates/ ACE-Inhibitors/Angiotensin Receptor Blockers/ Thiazolidinedione)

**Supplementary Table 6. Odds Ratios (OR) and 95% Confidence Intervals (CI) for sustained 40% decline in eGFR for 24-month urinary biomarkers indexed to urinary creatinine modeled categorically and continuously**

|                                      | <b>Model 1<br/>Odds Ratio<br/>(95% CI)</b> | <b>Model 2<br/>Odds Ratio<br/>(95% CI)</b> |
|--------------------------------------|--------------------------------------------|--------------------------------------------|
| <u>Urinary MCP-1/Cr at 24 months</u> |                                            |                                            |
| <=0.91 pg/mg                         | 1 (Ref)                                    | 1 (Ref)                                    |
| 0.92-1.41 pg/mg                      | 0.84 (0.46-1.52)                           | 0.43 (0.15-1.29)                           |
| 1.42-2.11 pg/mg                      | 1.17 (0.64-2.15)                           | 0.60 (0.21-1.71)                           |
| >=2.12 pg/mg                         | 1.93 (1.04-3.57)                           | 0.83 (0.29-2.38)                           |
| OR per 1 unit log increase           | 1.38 (1.04-1.84)                           | 0.85 (0.52-1.40)                           |
| <u>Urinary IL-18/Cr at 24 months</u> |                                            |                                            |
| <=0.15 pg/mg                         | 1 (Ref)                                    | 1 (Ref)                                    |
| 0.16-0.28 pg/mg                      | 0.86 (0.47-1.58)                           | 0.63 (0.21-1.86)                           |
| 0.29-0.46 pg/mg                      | 0.89 (0.49-1.61)                           | 1.67 (0.59-4.78)                           |
| >=0.47 pg/mg                         | 0.85 (0.45-1.60)                           | 1.83 (0.60-5.58)                           |
| OR per 1 unit log increase           | 0.88 (0.68-1.13)                           | 1.31 (0.82-2.09)                           |
| <u>Urinary KIM-1/Cr at 24 months</u> |                                            |                                            |
| <=3.97 pg/mg                         | 1 (Ref)                                    | 1 (Ref)                                    |
| 3.98-6.63 pg/mg                      | 1.49 (0.81-2.73)                           | 1.85 (0.68-5.02)                           |
| 6.64-10.51 pg/mg                     | 0.87 (0.46-1.65)                           | 1.64 (0.51-5.28)                           |
| >=10.52 pg/mg                        | 1.12 (0.61-2.05)                           | 0.75 (0.26-2.21)                           |
| OR per 1 unit log increase           | 0.93 (0.70-1.23)                           | 0.81 (0.48-1.36)                           |
| <u>Urinary YKL40/Cr at 24 months</u> |                                            |                                            |
| <=0.98 pg/mg                         | 1 (Ref)                                    | 1 (Ref)                                    |
| 0.99-3.08 pg/mg                      | 0.75 (0.41-1.37)                           | 0.66 (0.24-1.78)                           |
| 3.09-8.23 pg/mg                      | 0.54 (0.28-1.03)                           | 0.78 (0.27-2.30)                           |
| >=8.24 pg/mg                         | 0.85 (0.44-1.65)                           | 1.07 (0.38-3.06)                           |
| OR per 1 unit log increase           | 0.97 (0.84-1.12)                           | 0.96 (0.76-1.20)                           |
